# Supplementary material for: Motoneurons regulate the central pattern generator during drug-induced locomotor-like activity in the neonatal mouse
Source: eLife. 2017 Jul 3;6:e26622. doi: 10.7554/eLife.26622 (PMC5550280; doi:10.7554/eLife.26622)
Supplement: Figure 3—source data 1. — DOI: http://dx.doi.org/10.7554/eLife.26622.007 [file elife-26622-fig3-data1.xlsx]

## Sheet: 3B
frequency of Locomotor-like activity			related to figure 3 B
Experimental animals	WT	Chat-GFP	Chat-Arch	Chat-Halo
Mouse 1	0.490234	0.575968	0.365914	0.468401
Mouse 2	0.532819	0.502481	0.462155	0.441663
Mouse 3	0.509332	0.599023	0.339261	0.398342
Mouse 4	0.430587	0.567952	0.397668	0.355916
Mouse 5	0.442372	0.539923	0.449321	0.39595
Mouse 6	0.375551	0.523365	0.466064	0.541307
Mouse 7	0.480018	0.433733	0.454714	0.508845
Mouse 8	0.410703		0.404435	0.551767
Mouse 9	0.558101		0.431103	0.44538
Mouse 10	0.433163		0.456706	0.509935
Mouse 11	0.483888		0.405071	0.430832
Mouse 12	0.513112		0.653161	0.453735
Mouse 13	0.402479		0.538099
Mouse 14	0.516165		0.541114
Mouse 15	0.376144		0.519295
Mouse 16	0.298695		0.522379
Mouse 17	0.411778		0.62853
Mouse 18	0.433195		0.586582
Mouse 19	0.389821		0.530483
Mouse 20	0.456108		0.489976
Mouse 21	0.381561		0.450563
Mouse 22	0.346605		0.444339
Mouse 23	0.342497		0.537077
Mouse 24	0.484395		0.496892
Mouse 25	0.367082		0.554371
Mouse 26	0.530237
Mouse 27	0.450209
Mouse 28	0.404289
