# Supplementary material for: Motoneurons regulate the central pattern generator during drug-induced locomotor-like activity in the neonatal mouse
Source: eLife. 2017 Jul 3;6:e26622. doi: 10.7554/eLife.26622 (PMC5550280; doi:10.7554/eLife.26622)
Supplement: Figure 3—source data 2. — DOI: http://dx.doi.org/10.7554/eLife.26622.008 [file elife-26622-fig3-data2.xlsx]

## Sheet: 3F
Absolute phase Bilateral L2s					related to Figure 3 F
	WT	WT	WT	WT	WT	WT	WT	WT	WT	WT	WT	WT	WT	WT	WT	WT	WT	WT	WT	WT	WT	WT	WT	WT	WT	WT	WT	WT	ChAT-Arch	ChAT-Arch	ChAT-Arch	ChAT-Arch	ChAT-Arch	ChAT-Arch	ChAT-Arch	ChAT-Arch	ChAT-Arch	ChAT-Arch	ChAT-Arch	ChAT-Arch	ChAT-Arch	ChAT-Arch	ChAT-Arch	ChAT-Arch	ChAT-Arch	ChAT-Arch	ChAT-Arch	ChAT-Arch	ChAT-Arch
Control	4.90203	9.76769	3.11443	5.14529	10.1632	5.58983	7.8515	8.82865	6.51412	8.98435	8.30436	3.89861	9.40695	6.61339	12.1985	5.59716	5.85683	8.2215	7.25354	8.50631	8.31016	7.76755	10.306	4.43449	10.3405	7.66733	6.32824	10.7916	6.29655	8.50065	4.84197	15.3237	26.392	15.3317	17.1972	7.59905	4.67366	7.61597	9.10009	5.18246	11.1518	5.6737	8.26893	8.30534	6.05735	7.98768	14.1094	10.2252	15.0093
Light start	11.3778	18.9829	8.32429	51.627	11.5158	9.63837	6.99895	16.3729	10.314	22.888	14.8194	8.54864	9.05176	14.1046	14.7668	7.53019	8.66839	7.29852	6.52477	12.2944	18.8344	11.3569	13.1533	4.47654	9.71965	9.0817	7.39778	26.8711	18.1227	34.5886	65.5624	44.4321	16.9836	13.5139	14.6332	28.2047	11.2314	12.7667	7.92166	16.0686	23.3439	7.32741	12.9296	22.0494	14.8937	15.5578	24.5414	17.22	18.1396
Light end	3.64834	22.5493	5.05143	7.39555	8.28843	10.3148	10.3383	16.9521	7.83603	14.1757	9.10283	7.69398	9.50089	10.9016	8.15133	11.5482	6.44065	6.45846	7.65925	12.1559	10.2416	9.25924	16.1412	2.52939	9.35973	7.60688	8.10871	7.35529	12.8886	13.473	8.84271	12.0002	16.7283	7.54157	22.7505	20.9305	4.95254	11.5586	4.83381	6.99178	18.1443	11.6504	19.507	24.8888	9.88715	26.6778	14.2306	7.42284	10.2539
after light	5.3577	18.3117	9.56951	9.01652	11.9016	11.8011	8.54005	10.6186	4.36623	10.8641	10.3395	9.43974	11.0287	10.0487	12.0333	7.74235	9.12927	7.83591	7.2263	12.4779	31.1141	8.14439	13.0897	6.27317	16.9268	12.1203	5.66702	9.42901	15.8103	17.171	10.2936	17.9866	23.746	30.3114	19.8088	17.4217	9.74713	10.2408	9.4906	4.90675	8.45079	12.0944	18.9857	6.85575	7.75187	15.7056	10.195	5.48923	14.9283
Experimental animals	Mouse 1	Mouse 2	Mouse 3	Mouse 4	Mouse 5	Mouse 6	Mouse 7	Mouse 8	Mouse 9	Mouse 10	Mouse 11	Mouse 12	Mouse 13	Mouse 14	Mouse 15	Mouse 16	Mouse 17	Mouse 18	Mouse 19	Mouse 20	Mouse 21	Mouse 22	Mouse 23	Mouse 24	Mouse 25	Mouse 26	Mouse 27	Mouse 28	Mouse 1	Mouse 2	Mouse 3	Mouse 4	Mouse 5	Mouse 6	Mouse 7	Mouse 8	Mouse 9	Mouse 10	Mouse 11	Mouse 12	Mouse 13	Mouse 14	Mouse 15	Mouse 16	Mouse 17	Mouse 18	Mouse 19	Mouse 20	Mouse 21
[truncated: 16 more columns]
