# Supplementary material for: Motoneurons regulate the central pattern generator during drug-induced locomotor-like activity in the neonatal mouse
Source: eLife. 2017 Jul 3;6:e26622. doi: 10.7554/eLife.26622 (PMC5550280; doi:10.7554/eLife.26622)
Supplement: Figure 3—source data 4. — DOI: http://dx.doi.org/10.7554/eLife.26622.010 [file elife-26622-fig3-data4.xlsx]

## Sheet: 3H
Change in motoneuron firing				related to figure 3 H
	WT	WT	WT	WT	WT	WT	WT	WT	WT	WT	WT	WT	WT	WT	WT	WT	WT	WT	WT	WT	WT	WT	WT	WT	WT	WT	WT	WT	ChAT-Arch	ChAT-Arch	ChAT-Arch	ChAT-Arch	ChAT-Arch	ChAT-Arch	ChAT-Arch	ChAT-Arch	ChAT-Arch	ChAT-Arch	ChAT-Arch	ChAT-Arch	ChAT-Arch	ChAT-Arch	ChAT-Arch	ChAT-Arch	ChAT-Arch	ChAT-Arch	ChAT-Arch	ChAT-Arch	ChAT-Arch
Control	-0.07939	-0.0320035	-0.0294782	0.00610129	0.0266599	-0.106638	0.0391482	0.00546063	-0.00784531	-0.0067043	-0.00212799	-0.0063545	0.00435993	0.0487338	-0.0366491	0.0213661	-0.00304977	0.0338669	0.00274474	0.0132499	-0.0143069	-0.0101144	-0.017045	-0.0301365	-0.0227048	-0.089048	-0.053251	-0.00732771	0.0279485	-0.004284	0.00815926	-0.00812498	-0.0105176	0.000773596	-0.00114165	-0.00304258	-0.00242762	0.00611054	0.0176775	0.0076806	-0.00196934	-0.0149715	0.0126356	0.110991	-0.00903756	0.00867837	0.0405994	0.0201982	-0.0338247
Light start	0.0236726	0.00561794	0.0974314	0.0921368	0.178393	-0.125731	0.0793063	0.129967	-0.0378935	0.000283912	-0.00481195	0.0986435	-0.0446085	-0.0343895	0.0972288	0.0249892	0.0987948	0.00771228	-0.00322706	0.0144299	0.404746	0.129956	0.124987	0.0430955	0.0341163	0.161327	0.0903767	-0.112284	-0.831052	-0.66177	-0.648018	-0.612166	-0.458033	-0.462539	-0.702371	-0.712173	-0.586468	-0.655501	-0.752834	-0.771261	-0.673438	-0.730388	-0.611633	-0.483477	-0.711287	-0.68949	-0.469389	-0.707441	-0.611608
Light end	0.0107974	0.0918255	0.0182676	0.00753134	0.117356	-0.00730086	0.152418	0.0842592	-0.0361238	0.0194226	0.0335938	0.0616631	0.0543356	-0.0905161	0.0655989	0.00932192	-0.0404223	-0.07499	0.0153895	0.0397408	0.177915	-0.0570336	0.0097177	0.0886131	0.0491134	0.0571889	0.00262776	0.105702	-0.605806	-0.4239	-0.348969	-0.332952	-0.356947	-0.278443	-0.349975	-0.534532	-0.415292	-0.463305	-0.47108	-0.451309	-0.439373	-0.484409	-0.367263	-0.262337	-0.405153	-0.437267	-0.431115	-0.406274	-0.40643
after light	0.0458826	0.0722099	-0.0694156	0.0225632	0.0753796	0.124031	0.0459215	0.0129638	0.0993931	-0.00921019	0.016224	0.00914687	0.0894068	-0.00157456	0.0943266	-0.0227321	-0.109978	0.00539686	-0.0497038	-0.00582408	0.0333665	-0.107596	0.00264356	0.00983835	0.0301111	-0.0500587	0.0130714	0.128236	0.212105	0.415312	0.957153	0.401677	0.150924	0.227159	0.281922	0.322104	0.215563	0.279896	0.29965	0.279623	0.378489	0.240252	0.16939	0.162944	0.213911	0.190871	0.240705	0.181458	0.158802
Experimental animals	Mouse 1	Mouse 2	Mouse 3	Mouse 4	Mouse 5	Mouse 6	Mouse 7	Mouse 8	Mouse 9	Mouse 10	Mouse 11	Mouse 12	Mouse 13	Mouse 14	Mouse 15	Mouse 16	Mouse 17	Mouse 18	Mouse 19	Mouse 20	Mouse 21	Mouse 22	Mouse 23	Mouse 24	Mouse 25	Mouse 26	Mouse 27	Mouse 28	Mouse 1	Mouse 2	Mouse 3	Mouse 4	Mouse 5	Mouse 6	Mouse 7	Mouse 8	Mouse 9	Mouse 10	Mouse 11	Mouse 12	Mouse 13	Mouse 14	Mouse 15	Mouse 16	Mouse 17	Mouse 18	Mouse 19	Mouse 20	Mouse 21
[truncated: 16 more columns]
