# Supplementary material for: Motoneurons regulate the central pattern generator during drug-induced locomotor-like activity in the neonatal mouse
Source: eLife. 2017 Jul 3;6:e26622. doi: 10.7554/eLife.26622 (PMC5550280; doi:10.7554/eLife.26622)
Supplement: Figure 6—source data 1. — DOI: http://dx.doi.org/10.7554/eLife.26622.023 [file elife-26622-fig6-data1.xlsx]

## Sheet: 6B
frequency of Locomotor-like activity			related to figure 6 B
		Experimental animals	WT	WT CA	Chat-Arch	Chat-Arch CA			Cholinergic Antagonists (CA)
		Mouse 1	0.532819	0.333524	0.538099	0.358459
		Mouse 2	0.509332	0.347786	0.541114	0.377565
		Mouse 3	0.442372	0.31669	0.519295	0.43816
		Mouse 4	0.433195	0.369755	0.522379	0.407833
		Mouse 5	0.346605	0.297431	0.496892	0.359906
		Mouse 6	0.484395	0.315293	0.554371	0.383075
		Mouse 7	0.367082	0.369948
		Mouse 8	0.530237	0.384028
		Mouse 9	0.450209	0.347396
		Mouse 10	0.404289	0.358778
