# Supplementary material for: Motoneurons regulate the central pattern generator during drug-induced locomotor-like activity in the neonatal mouse
Source: eLife. 2017 Jul 3;6:e26622. doi: 10.7554/eLife.26622 (PMC5550280; doi:10.7554/eLife.26622)
Supplement: Figure 6—source data 2. — DOI: http://dx.doi.org/10.7554/eLife.26622.024 [file elife-26622-fig6-data2.xlsx]

## Sheet: 6C
absolute phase bilateral (L2s)				related to figure6 C
	WT	WT CA	WT	WT CA	WT	WT CA	WT	WT CA	WT	WT CA	WT	WT CA	WT	WT CA	WT	WT CA	WT	WT CA	WT	WT CA	Chat-Arch	Chat-Arch CA	Chat-Arch	Chat-Arch CA	Chat-Arch	Chat-Arch CA	Chat-Arch	Chat-Arch CA	Chat-Arch	Chat-Arch CA	Chat-Arch	Chat-Arch CA
Control	9.76769	11.5847	3.11443	16.7736	10.1632	24.1053	8.2215	35.1702	7.76755	28.6974	4.43449	34.6133	10.3405	23.1226	7.66733	52.8058	6.32825	22.5897	10.7916	30.1225	11.1518	44.4146	5.6737	16.5083	8.26893	16.8553	8.30534	22.3471	7.53033	17.0315	21.3485	25.2928
Light start	18.9829	11.072	8.32429	29.6302	11.5158	23.0843	7.29852	30.7941	11.3569	12.1066	4.47653	68.43	9.71965	37.0412	9.0817	31.0584	7.39778	18.696	26.8711	35.7245	23.3439	36.7672	7.32741	56.3557	12.9296	58.925	22.0494	48.7541	12.0079	58.7706	15.0963	23.9513
Light end	22.5493	9.85933	5.05143	14.0377	8.28843	18.5824	6.45846	27.053	9.25924	7.80048	2.52939	23.8051	9.35973	23.2034	7.60688	19.7006	8.10871	14.1708	7.35529	33.2472	18.1443	31.3524	11.6504	17.667	19.507	22.9011	24.8888	20.63	7.75464	36.792	15.141	19.9197
after light	18.3117	10.5925	9.56951	13.2034	11.9016	21.2156	7.83591	30.4056	8.14439	13.4099	6.27317	21.8352	16.9268	16.0004	12.1203	12.6803	5.66702	15.1213	9.42901	13.5518	8.45079	43.9401	12.0944	23.0823	18.9857	11.3993	6.85575	13.741	9.32344	22.3433	22.3978	20.1944
Experimental Animals	Mouse 1		Mouse 2		Mouse 3		Mouse 4		Mouse 5		Mouse 6		Mouse 7		Mouse 8		Mouse 9		Mouse 10		Mouse 1		Mouse 2		Mouse 3		Mouse 4		Mouse 5		Mouse 6
