# Supplementary material for: Motoneurons regulate the central pattern generator during drug-induced locomotor-like activity in the neonatal mouse
Source: eLife. 2017 Jul 3;6:e26622. doi: 10.7554/eLife.26622 (PMC5550280; doi:10.7554/eLife.26622)
Supplement: Figure 6—source data 3. — DOI: http://dx.doi.org/10.7554/eLife.26622.025 [file elife-26622-fig6-data3.xlsx]

## Sheet: 6D
Normalized bilateral (L2s) frequency				related to figure6 D
	WT	WT CA	WT	WT CA	WT	WT CA	WT	WT CA	WT	WT CA	WT	WT CA	WT	WT CA	WT	WT CA	WT	WT CA	WT	WT CA	Chat-Arch	Chat-Arch CA	Chat-Arch	Chat-Arch CA	Chat-Arch	Chat-Arch CA	Chat-Arch	Chat-Arch CA	Chat-Arch	Chat-Arch CA	Chat-Arch	Chat-Arch CA
Control	0.0202659	0.00283801	0.0302294	0.0594142	0.00254572	0.0289406	0.00400068	0.0756843	-0.00395219	0.0234119	-0.00394927	-0.0223312	-0.00886223	-0.00203354	-0.0247833	0.00891653	0.0150617	-0.0251181	0.0140872	-0.0222447	-0.00657987	-0.0449409	0.00894213	-0.00446406	0.0139954	0.0435361	-0.0372487	0.0183181	0.00254946	0.037052	0.00785461	-0.0145296
Light start	-0.0207713	0.0452846	-0.0981279	-0.00471851	-0.0586984	-0.0168262	-0.0417825	-0.0486165	0.0719147	-0.0080472	-0.021906	-0.0625001	0.00840875	-0.017365	0.0332431	-0.0445084	0.00396054	0.0417551	0.0911053	0.0240342	-0.0804754	-0.138722	-0.0319111	-0.123016	-0.119376	-0.153308	-0.126913	-0.100826	-0.0407753	-0.110609	-0.0791613	-0.138465
Light end	-0.0043996	-0.0117937	-0.0504529	0.0525808	-0.00353402	0.0223126	-0.0811258	-0.0244853	0.0594679	-0.00721524	-0.0649156	-0.0333527	0.0399687	0.0955094	0.0921096	-0.0571826	-0.0488002	0.0491335	0.135142	-0.0406561	0.0415191	-0.0104603	0.0255243	-0.0949034	0.0448793	-0.0753742	-0.0601571	0.0318694	-0.0212881	0.0070209	-0.0826447	-0.0633026
after light	-0.0162726	0.0782971	-0.0365955	0.0689348	0.0303967	0.0379312	-0.0396142	0.0213007	0.028293	-0.00182799	-0.0406914	-0.0185084	0.0257164	0.14919	0.0509064	0.032633	-0.0726371	0.120204	0.112897	-0.0148965	0.0816078	0.104186	0.0699553	0.0840803	0.169838	0.118699	0.0742389	0.250535	0.0077269	0.146373	0.0281062	0.057951
Experimental Animals	Mouse 1		Mouse 2		Mouse 3		Mouse 4		Mouse 5		Mouse 6		Mouse 7		Mouse 8		Mouse 9		Mouse 10		Mouse 1		Mouse 2		Mouse 3		Mouse 4		Mouse 5		Mouse 6
