# Supplementary material for: Motoneurons regulate the central pattern generator during drug-induced locomotor-like activity in the neonatal mouse
Source: eLife. 2017 Jul 3;6:e26622. doi: 10.7554/eLife.26622 (PMC5550280; doi:10.7554/eLife.26622)
Supplement: Figure 6—source data 4. — DOI: http://dx.doi.org/10.7554/eLife.26622.026 [file elife-26622-fig6-data4.xlsx]

## Sheet: 6E
Change in motoneuron firing (L2)				related to figure6 E
	WT	WT CA	WT	WT CA	WT	WT CA	WT	WT CA	WT	WT CA	WT	WT CA	WT	WT CA	WT	WT CA	WT	WT CA	WT		Chat-Arch	Chat-Arch CA	Chat-Arch	Chat-Arch CA	Chat-Arch	Chat-Arch CA	Chat-Arch	Chat-Arch CA	Chat-Arch	Chat-Arch CA	Chat-Arch	Chat-Arch CA
Control	-0.0320035	0.07354	-0.0294782	-0.019734	0.0266599	-0.174247	0.0338669	0.0272777	-0.0101144	-0.0295607	-0.0301365	0.0187654	-0.0227048	0.0269725	-0.089048	-0.0931282	-0.053251	-0.00715801	-0.00732771		-0.00196934	-0.0112385	-0.0149715	-0.0656995	0.0126356	-0.0260179	0.110991	-0.0317565	0.00239941	0.017691	0.0152411	-0.0314741
Light start	0.00561794	0.235953	0.0974314	0.00729708	0.178393	0.0445809	0.00771228	0.133094	0.129956	0.0796026	0.0430955	0.0574437	0.0341163	-0.00225939	0.161327	0.114021	0.0903767	0.126964	-0.112284		-0.673438	-0.603327	-0.730388	-0.67493	-0.611633	-0.696689	-0.483477	-0.45643	-0.59524	-0.591874	-0.381131	-0.523655
Light end	0.0918255	0.212642	0.0182676	0.120239	0.117356	0.0936353	-0.07499	-0.151378	-0.0570336	-0.0388828	0.0886131	0.0140228	0.0491134	0.0561996	0.0571889	0.0527688	0.00262776	0.0406006	0.105702		-0.439373	-0.254672	-0.484409	-0.390495	-0.367263	-0.454554	-0.262337	-0.212472	-0.405342	-0.41684	-0.253871	-0.169161
after light	0.0722099	0.0262706	-0.0694156	-0.0901886	0.0753796	-0.104954	0.00539686	0.0295218	-0.107596	-0.100568	0.00983835	0.0381145	0.0301111	-0.0193766	-0.0500587	0.0716832	0.0130714	0.0748104	0.128236		0.378489	0.134749	0.240252	0.369682	0.16939	0.137807	0.162944	0.143117	0.153009	0.187365	0.155946	0.213732
Experimental Animals	Mouse 1		Mouse 2		Mouse 3		Mouse 4		Mouse 5		Mouse 6		Mouse 7		Mouse 8		Mouse 9		Mouse 10		Mouse 1		Mouse 2		Mouse 3		Mouse 4		Mouse 5		Mouse 6
