# Supplementary material for: Motoneurons regulate the central pattern generator during drug-induced locomotor-like activity in the neonatal mouse
Source: eLife. 2017 Jul 3;6:e26622. doi: 10.7554/eLife.26622 (PMC5550280; doi:10.7554/eLife.26622)
Supplement: Figure 8—source data 1. — DOI: http://dx.doi.org/10.7554/eLife.26622.031 [file elife-26622-fig8-data1.xlsx]

## Sheet: 8C
Normalized Amplitude of the short latency depolarizations in ChAT-Arch spinal cords								related to figure 8 C
		CBX	CBX	CBX	CBX	CBX
Experimental animals	Control	5 minutes	10 minutes	20 minutes	30 minutes	40 minutes		CBX= 100uM Carbenoxolone
Mouse 1	1	0.7119	0.6113	0.6762	0.5012	0.4861
Mouse 2	1	0.9068	0.8878	0.8998	0.6356	0.5396
Mouse 3	1	0.9732	0.9269	0.7967	0.677	0.4982
Mouse 4	1	0.8909	0.5741	0.4025	0.2287	0.2355
Mouse 5	1	0.8769	0.5742	0.4092	0	0
