# Supplementary material for: Motoneurons regulate the central pattern generator during drug-induced locomotor-like activity in the neonatal mouse
Source: eLife. 2017 Jul 3;6:e26622. doi: 10.7554/eLife.26622 (PMC5550280; doi:10.7554/eLife.26622)
Supplement: Figure 8—source data 2. — DOI: http://dx.doi.org/10.7554/eLife.26622.032 [file elife-26622-fig8-data2.xlsx]

## Sheet: 8E
frequency of locomotor like activity					related to figure 8 E
Experimental animals	WT	WT CBX	Chat-Arch	Chat-Arch CBX	CBX= 100uM Carbenoxolone
Mouse 1	0.433163	0.318115	0.365914	0.273308
Mouse 2	0.483888	0.232092	0.462155	0.22153
Mouse 3	0.513112	0.295808	0.339261	0.235396
Mouse 4	0.402479	0.34099	0.397668	0.314043
Mouse 5	0.411778	0.285623	0.444339	0.308634
Mouse 6			0.537077	0.334616
