# Supplementary material for: Motoneurons regulate the central pattern generator during drug-induced locomotor-like activity in the neonatal mouse
Source: eLife. 2017 Jul 3;6:e26622. doi: 10.7554/eLife.26622 (PMC5550280; doi:10.7554/eLife.26622)
Supplement: Figure 8—source data 3. — DOI: http://dx.doi.org/10.7554/eLife.26622.033 [file elife-26622-fig8-data3.xlsx]

## Sheet: Sheet1
Absolute phase bilateral flexors (L2s)					related to figure 8 F
			CBX= 100uM Carbenoxolone
	WT	WT CBX	WT	WT CBX	WT	WT CBX	WT	WT CBX	WT	WT CBX	Chat-Arch	Chat-Arch CBX	Chat-Arch	Chat-Arch CBX	Chat-Arch	Chat-Arch CBX	Chat-Arch	Chat-Arch CBX	Chat-Arch	Chat-Arch CBX	Chat-Arch	Chat-Arch CBX
Control	8.98435	10.1317	8.30436	11.6467	3.89861	14.993	9.40695	13.7117	5.85683	6.71686	6.29654	25.5856	8.50065	22.2012	4.84197	16.3037	15.3237	11.9063	4.45937	6.44772	6.98973	14.9242
Light start	22.888	37.636	14.8194	10.8889	8.54864	23.226	9.05176	12.7681	8.66839	15.0116	18.1227	102.811	34.5886	38.0032	65.5624	70.9714	44.4321	47.4989	16.7611	48.2084	17.7901	27.1326
Light end	14.1757	9.60376	9.10283	16.779	7.69398	21.6708	9.50089	9.84929	6.44065	9.52961	12.8886	49.5762	13.473	20.6514	8.84271	18.475	12.0002	19.7203	12.8102	19.2622	11.8714	21.2548
after light	10.8641	14.2115	10.3395	14.0092	9.43974	27.2321	11.0287	6.39847	9.12927	10.8832	15.8103	43.5732	17.171	38.1825	10.2936	25.0007	17.9866	48.3743	10.774	17.1362	15.9246	12.5564
Experimental Animals	Mouse 1		Mouse 2		Mouse 3		Mouse 4		Mouse 5		Mouse 1		Mouse 2		Mouse 3		Mouse 4		Mouse 5		Mouse 6				Mouse 7
