# Supplementary material for: Motoneurons regulate the central pattern generator during drug-induced locomotor-like activity in the neonatal mouse
Source: eLife. 2017 Jul 3;6:e26622. doi: 10.7554/eLife.26622 (PMC5550280; doi:10.7554/eLife.26622)
Supplement: Figure 8—source data 4. — DOI: http://dx.doi.org/10.7554/eLife.26622.034 [file elife-26622-fig8-data4.xlsx]

## Sheet: 8G
Normalized frequency bilateral flexors (L2s)				related to figure 8 G		CBX= 100uM Carbenoxolone
	WT	WT CBX	WT	WT CBX	WT	WT CBX	WT	WT CBX	WT	WT CBX	Chat-Arch	Chat-Arch CBX	Chat-Arch	Chat-Arch CBX	Chat-Arch	Chat-Arch CBX	Chat-Arch	Chat-Arch CBX	Chat-Arch	Chat-Arch CBX	Chat-Arch	Chat-Arch CBX
Control	0.0378562	-0.00275881	0.00391034	0.00576795	0.00308002	-0.00690354	0.00277079	-0.0215299	0.0104762	-0.0135109	0.0438341	0.0154739	0.0396705	0.00112175	-0.0254928	0.0298265	0.0319337	0.0141716	0.00786751	-0.00704142	0.0174252	-0.00322981
Light start	0.00101029	-0.0160657	0.0144507	0.00356519	-0.0194316	-0.0626265	-0.0119887	-0.0386311	0.0353203	-0.0352311	-0.0509416	-0.107361	-0.0544252	-0.0682845	-0.0463441	-0.0532565	-0.0576345	-0.098008	-0.0810636	-0.162267	-0.0913342	-0.0771419
Light end	-0.0458906	-0.0227514	-0.0170748	-0.0269876	-0.0431245	-0.0190481	-0.103817	-0.107874	0.0906564	0.0356644	0.164809	0.041554	0.110745	-0.0515877	0.000808774	0.0492713	0.0785814	0.000524786	-0.0399675	0.0108107	-0.0255285	-0.0358886
after light	-0.0570155	0.0664964	-0.0155437	-0.0505517	-0.0538767	0.0611606	-0.0789936	-0.0792075	0.0448966	0.0710613	0.366862	0.0776737	0.174156	0.0229391	0.124653	0.0964833	0.190608	0.0430365	0.0610907	0.127281	0.0196556	0.106409
Experimental Animals	Mouse 1		Mouse 2		Mouse 3		Mouse 4		Mouse 5		Mouse 1		Mouse 2		Mouse 3		Mouse 4		Mouse 5		Mouse 6				Mouse 7
