# Supplementary material for: Motoneurons regulate the central pattern generator during drug-induced locomotor-like activity in the neonatal mouse
Source: eLife. 2017 Jul 3;6:e26622. doi: 10.7554/eLife.26622 (PMC5550280; doi:10.7554/eLife.26622)
Supplement: Figure 8—source data 5. — DOI: http://dx.doi.org/10.7554/eLife.26622.035 [file elife-26622-fig8-data5.xlsx]

## Sheet: 8H
Change in motoneuron Firing			related to figure 8 H
		CBX= 100uM Carbenoxolone
	WT	WT CBX	WT	WT CBX	WT	WT CBX	WT	WT CBX	WT	WT CBX	Chat-Arch	Chat-Arch CBX	Chat-Arch	Chat-Arch CBX	Chat-Arch	Chat-Arch CBX	Chat-Arch	Chat-Arch CBX	Chat-Arch	Chat-Arch CBX	Chat-Arch	Chat-Arch CBX
Control	-0.0067043	0.00179372	-0.00212799	-0.0383222	-0.0063545	-0.0350844	0.00435993	0.00302204	-0.00304977	0.00198053	0.0279485	0.0261177	-0.004284	0.0208894	0.00815926	0.011941	-0.00812498	-0.00620534	0.0133801	0.0218136	0.0131862	0.00648205
Light start	0.000283912	-0.0773398	-0.00481195	-0.0220539	0.0986435	0.0170048	-0.0446085	-0.0391891	0.0987948	0.0495183	-0.831052	-0.741947	-0.66177	-0.913623	-0.648018	-0.45546	-0.612166	-0.771101	-0.701892	-0.929616	-0.545544	-0.628257
Light end	0.0194226	0.0257513	0.0335938	0.0116852	0.0616631	-0.00906978	0.0543356	0.0545968	-0.0404223	-0.0388042	-0.605806	-0.555668	-0.4239	-0.709815	-0.348969	-0.286814	-0.332952	-0.268208	-0.386451	-0.549269	-0.420903	-0.439405
after light	-0.00921019	0.0205925	0.016224	-0.0342158	0.00914687	-0.0471878	0.0894068	0.103489	-0.109978	-0.105569	0.212105	0.24733	0.415312	0.69443	0.957153	0.678522	0.401677	0.576543	0.328818	0.297254	0.171334	0.283835
Experimental Animals	Mouse 1		Mouse 2		Mouse 3		Mouse 4		Mouse 5		Mouse 1		Mouse 2		Mouse 3		Mouse 4		Mouse 5		Mouse 6				Mouse 7
