# Supplementary material for: Motoneurons regulate the central pattern generator during drug-induced locomotor-like activity in the neonatal mouse
Source: eLife. 2017 Jul 3;6:e26622. doi: 10.7554/eLife.26622 (PMC5550280; doi:10.7554/eLife.26622)
Supplement: Figure 9—source data 1. — DOI: http://dx.doi.org/10.7554/eLife.26622.038 [file elife-26622-fig9-data1.xlsx]

## Sheet: 9B
frequency of Locomotor-like activity					related to figure 9 B
		Experimental animals	WT	WT NBQX	Chat-Arch	Chat-Arch NBQX
		Mouse 1	0.375551	0.277004	0.449321	0.328481
		Mouse 2	0.480018	0.296217	0.404435	0.323773
		Mouse 3	0.410703	0.286722	0.456706	0.34675
		Mouse 4	0.558101	0.390347	0.62853	0.414325
		Mouse 5	0.376144	0.249256	0.586582	0.367789
		Mouse 6	0.456108	0.329369	0.530483	0.347368
		Mouse 7			0.450563	0.362863
