# Supplementary material for: Motoneurons regulate the central pattern generator during drug-induced locomotor-like activity in the neonatal mouse
Source: eLife. 2017 Jul 3;6:e26622. doi: 10.7554/eLife.26622 (PMC5550280; doi:10.7554/eLife.26622)
Supplement: Figure 9—source data 2. — DOI: http://dx.doi.org/10.7554/eLife.26622.039 [file elife-26622-fig9-data2.xlsx]

## Sheet: 9C
absolute phase bilateral (L2s)				related to figure 9 C
	WT	WT NBQX	WT	WT NBQX	WT	WT NBQX	WT	WT NBQX	WT	WT NBQX	WT	WT NBQX	Chat-Arch	Chat-Arch NBQX	Chat-Arch	Chat-Arch NBQX	Chat-Arch	Chat-Arch NBQX	Chat-Arch	Chat-Arch NBQX	Chat-Arch	Chat-Arch NBQX	Chat-Arch	Chat-Arch NBQX	Chat-Arch	Chat-Arch NBQX
Control	5.58983	24.2582	7.8515	18.5554	8.82865	7.64912	6.51411	6.14192	12.1985	17.1667	8.50631	9.21732	26.392	31.222	7.59905	16.4907	7.61596	8.09224	6.05735	14.3865	7.98768	5.6109	14.1094	7.36552	15.0093	13.2746
Light start	9.63837	27.2004	6.99895	25.8364	16.3729	54.3206	10.314	18.3977	14.7669	32.8631	12.2944	10.5427	16.9836	57.5693	28.2047	23.3411	12.7667	17.1454	14.8937	37.6014	15.5578	16.9893	24.5414	16.515	18.1396	15.5592
Light end	10.3148	45.2668	10.3383	24.7681	16.9521	11.4644	7.83603	8.46464	8.15133	60.8326	12.1559	19.5327	16.7283	62.3224	20.9305	27.1541	11.5586	13.3625	9.88715	21.3084	26.6778	20.0168	14.2306	6.82046	10.2539	13.9592
after light	11.8011	53.7039	8.54005	44.2629	10.6186	30.0938	4.36622	6.04186	12.0332	40.1529	12.4779	11.5679	23.746	69.1124	17.4217	51.6145	10.2408	23.2359	7.75187	28.2833	15.7056	14.3985	10.195	14.796	14.9283	27.2109
Experimental Animals	Mouse 1		Mouse 2		Mouse 3		Mouse 4		Mouse 5		Mouse 6		Mouse 1		Mouse 2		Mouse 3		Mouse 4		Mouse 5		Mouse 6		Mouse 7
