# Supplementary material for: Motoneurons regulate the central pattern generator during drug-induced locomotor-like activity in the neonatal mouse
Source: eLife. 2017 Jul 3;6:e26622. doi: 10.7554/eLife.26622 (PMC5550280; doi:10.7554/eLife.26622)
Supplement: Figure 9—source data 3. — DOI: http://dx.doi.org/10.7554/eLife.26622.040 [file elife-26622-fig9-data3.xlsx]

## Sheet: 9D
Normalized bilateral (L2s) frequency				related to figure 9 D
	WT	WT NBQX	WT	WT NBQX	WT	WT NBQX	WT	WT NBQX	WT	WT NBQX	WT	WT NBQX	Chat-Arch	Chat-Arch NBQX	Chat-Arch	Chat-Arch NBQX	Chat-Arch	Chat-Arch NBQX	Chat-Arch	Chat-Arch NBQX	Chat-Arch	Chat-Arch NBQX	Chat-Arch	Chat-Arch NBQX	Chat-Arch	Chat-Arch NBQX
Control	-0.00536389	-0.0184264	-0.0110202	0.0231036	-0.0322459	0.0109438	0.00850315	0.000227664	0.0703209	-0.0263864	-0.00751771	-0.0107628	-0.0123175	0.0261963	-0.00704843	-0.00956621	-0.00275158	-0.0189466	0.00984091	0.00402268	0.00644561	0.0194435	0.00188411	-0.00267312	0.0354421	0.00871972
Light start	-0.0247408	0.104754	-0.0273715	0.036973	-0.0448238	0.0272273	-0.0412217	0.00123507	0.0122564	0.13314	-0.000617805	0.0613942	-0.0610316	-0.0088679	-0.0936793	-0.0336067	0.00972339	0.0149875	-0.0886239	-0.130425	-0.0924095	0.00783792	-0.0396339	0.019209	-0.0834173	0.026862
Light end	-0.0314062	0.0450985	-0.095015	-0.00999317	-0.107273	-0.0941349	-0.0606575	-0.037569	-0.0558942	-0.0343118	-0.013584	-0.113151	0.0228424	-0.0088679	-0.0393431	-0.0336067	0.107287	0.0149875	-0.10251	-0.130425	0.0212422	0.00783792	0.0235634	0.019209	-0.0815266	0.026862
after light	-0.0364515	0.0206384	-0.0696839	-0.0526423	-0.0789796	-0.0903572	-0.0599489	-0.0328201	-0.0647061	-0.0406863	-0.00949062	-0.107704	0.0820814	-0.0088679	0.0190794	-0.0336067	0.0873078	0.0149875	-0.044613	-0.130425	0.0704466	0.00783792	0.0992631	0.019209	-0.0131707	0.026862
Experimental Animals	Mouse 1		Mouse 2		Mouse 3		Mouse 4		Mouse 5		Mouse 6		Mouse 1		Mouse 2		Mouse 3		Mouse 4		Mouse 5		Mouse 6		Mouse 7
