# Supplementary material for: Motoneurons regulate the central pattern generator during drug-induced locomotor-like activity in the neonatal mouse
Source: eLife. 2017 Jul 3;6:e26622. doi: 10.7554/eLife.26622 (PMC5550280; doi:10.7554/eLife.26622)
Supplement: Figure 9—source data 4. — DOI: http://dx.doi.org/10.7554/eLife.26622.041 [file elife-26622-fig9-data4.xlsx]

## Sheet: 9E
Change in Motoneuron Firing (L2)				related to figure 9 E
	WT	WT NBQX	WT	WT NBQX	WT	WT NBQX	WT	WT NBQX	WT	WT NBQX	WT	WT NBQX	Chat-Arch	Chat-Arch NBQX	Chat-Arch	Chat-Arch NBQX	Chat-Arch	Chat-Arch NBQX	Chat-Arch	Chat-Arch NBQX	Chat-Arch	Chat-Arch NBQX	Chat-Arch	Chat-Arch NBQX	Chat-Arch	Chat-Arch NBQX
Control	-0.106638	0.065823	0.0391482	-0.0164695	0.00546063	-0.021189	-0.00784531	0.0247441	-0.0366491	-0.00960502	0.0132499	0.00302371	-0.0105176	0.0143294	-0.00304258	0.0168177	0.00611054	0.0164502	-0.00903756	-0.0204251	0.00867837	0.0120975	0.0405994	-0.00200571	-0.0338247	0.0426798
Light start	-0.125731	0.327378	0.0793063	0.043573	0.129967	0.0459116	-0.0378935	0.0452219	0.0972288	0.130563	0.0144299	0.232364	-0.458033	-0.916584	-0.712173	-0.796454	-0.655501	-0.741539	-0.711287	-0.784555	-0.68949	-0.741156	-0.469389	-0.790795	-0.611608	-0.629533
Light end	-0.00730086	-0.117334	0.152418	0.136376	0.0842592	-0.0350919	-0.0361238	0.029426	0.0655989	-0.0282837	0.0397408	0.0304595	-0.356947	-0.801878	-0.534532	-0.776482	-0.463305	-0.552634	-0.405153	-0.435199	-0.437267	-0.427776	-0.431115	-0.513258	-0.40643	-0.4075
after light	0.124031	-0.132096	0.0459215	-0.0739847	0.0129638	-0.0340664	0.0993931	-0.0546965	0.0943266	-0.105133	-0.00582408	-0.0364647	0.150924	0.364478	0.322104	0.47381	0.279896	0.189211	0.213911	0.298518	0.190871	0.266491	0.240705	0.260041	0.158802	0.253891
Experimental Animals	Mouse 1		Mouse 2		Mouse 3		Mouse 4		Mouse 5		Mouse 6		Mouse 1		Mouse 2		Mouse 3		Mouse 4		Mouse 5		Mouse 6		Mouse 7
