# Supplementary material for: Motoneurons regulate the central pattern generator during drug-induced locomotor-like activity in the neonatal mouse
Source: eLife journal article supplement (doi:10.7554/elife.26622), 2017-07-03

Figure 8—figure supplement 1

**A** Wild type - Carbenoxolone

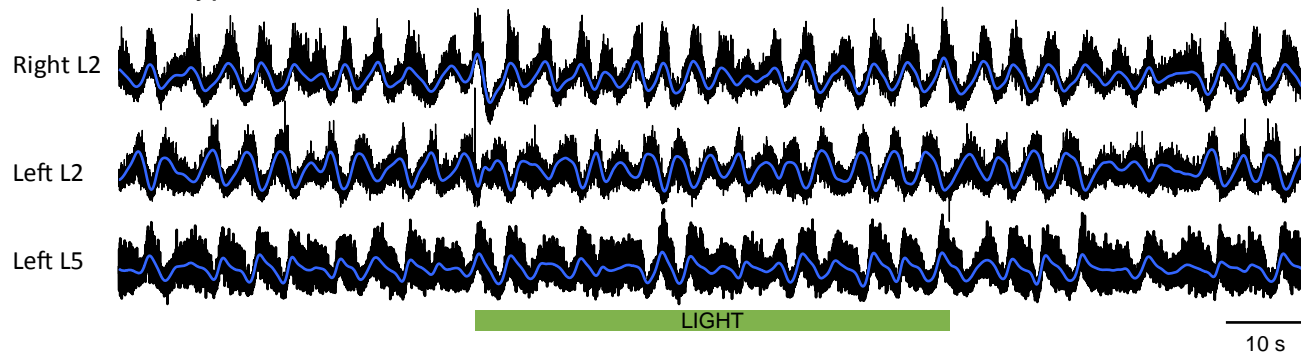

**B1** Abs.  $\Phi$  (degrees)

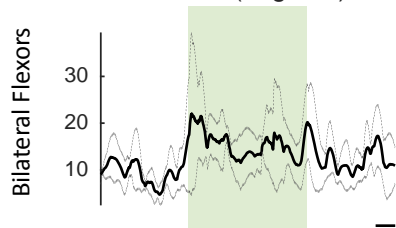

**C1** Freq. Change (%)

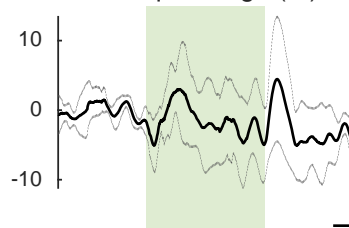

**D1** Change in MN Firing (%)

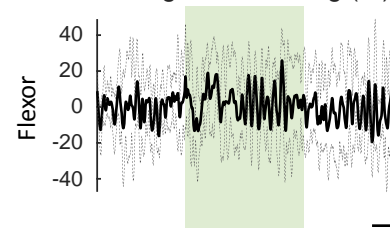

**B2**

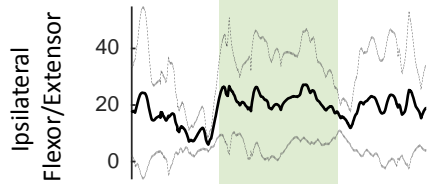

**C2**

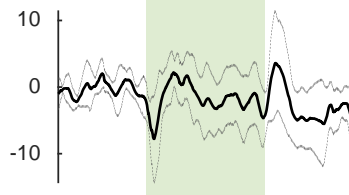

**D2**

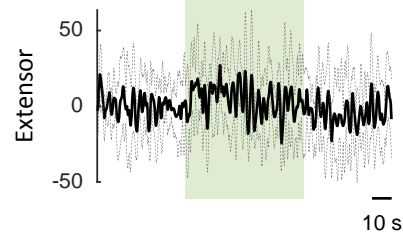

Supplement: supp [file elife_poa_e26622_Figure_8_figure_supplement_1.pdf › elife_poa_e26622_Figure_8_figure_supplement_1.pdf]
