# Supplementary figures and images for: Motoneurons regulate the central pattern generator during drug-induced locomotor-like activity in the neonatal mouse
Source: eLife journal article supplement (doi:10.7554/elife.26622), 2017-07-03

## Figure 4-figure supplement 2

### A. Flexors

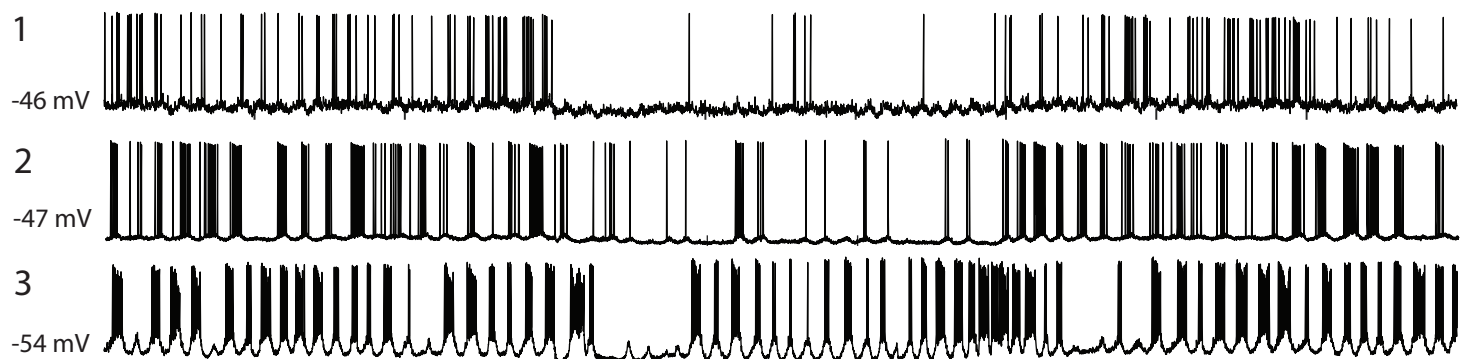

### B. Extensors

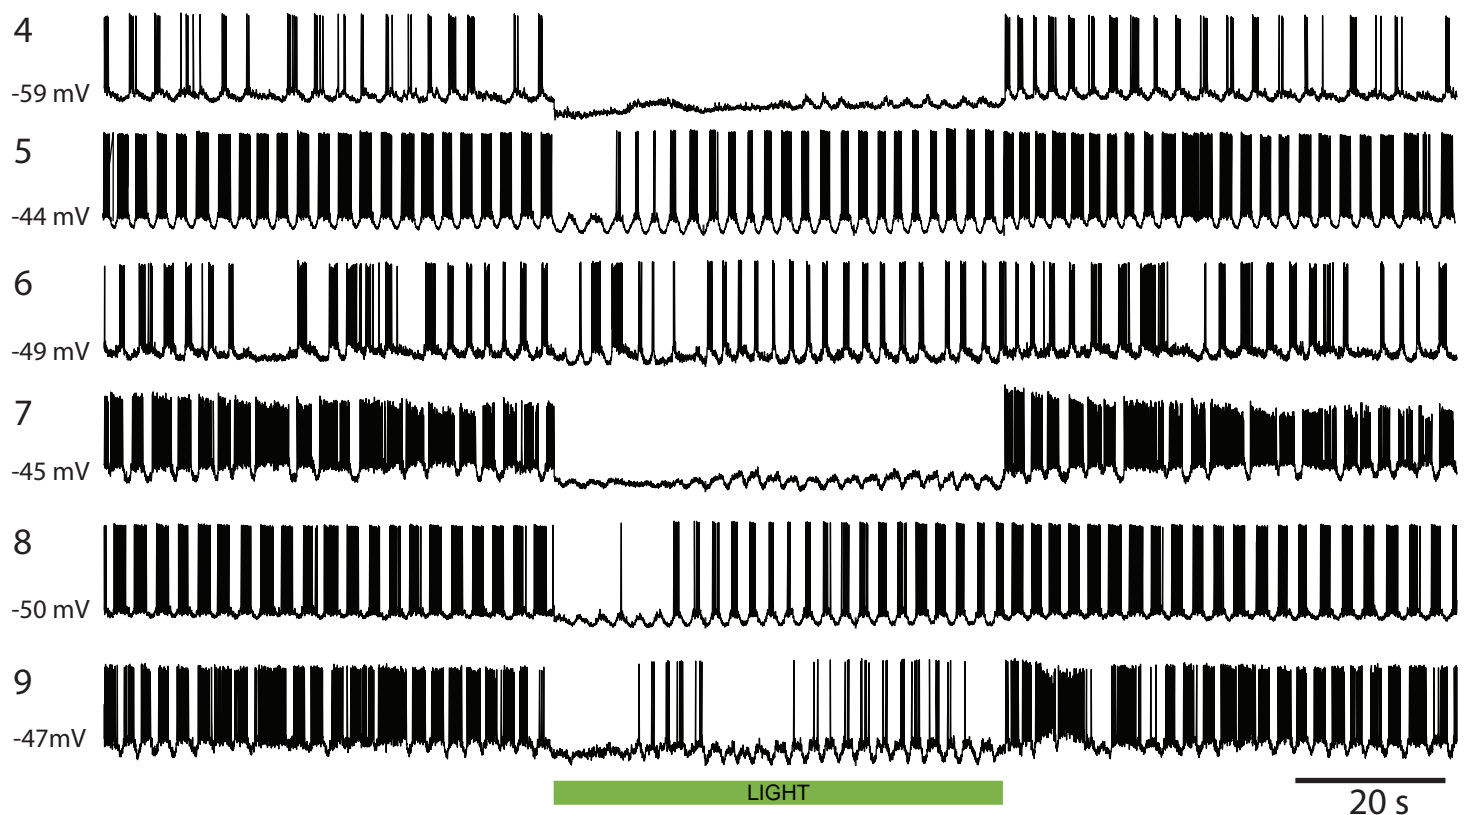

Supplement: supp [file elife_poa_e26622_Figure4_figure_Supplement_2.pdf › elife_poa_e26622_Figure4_figure_Supplement_2.pdf]

Figure 2—figure supplement 2

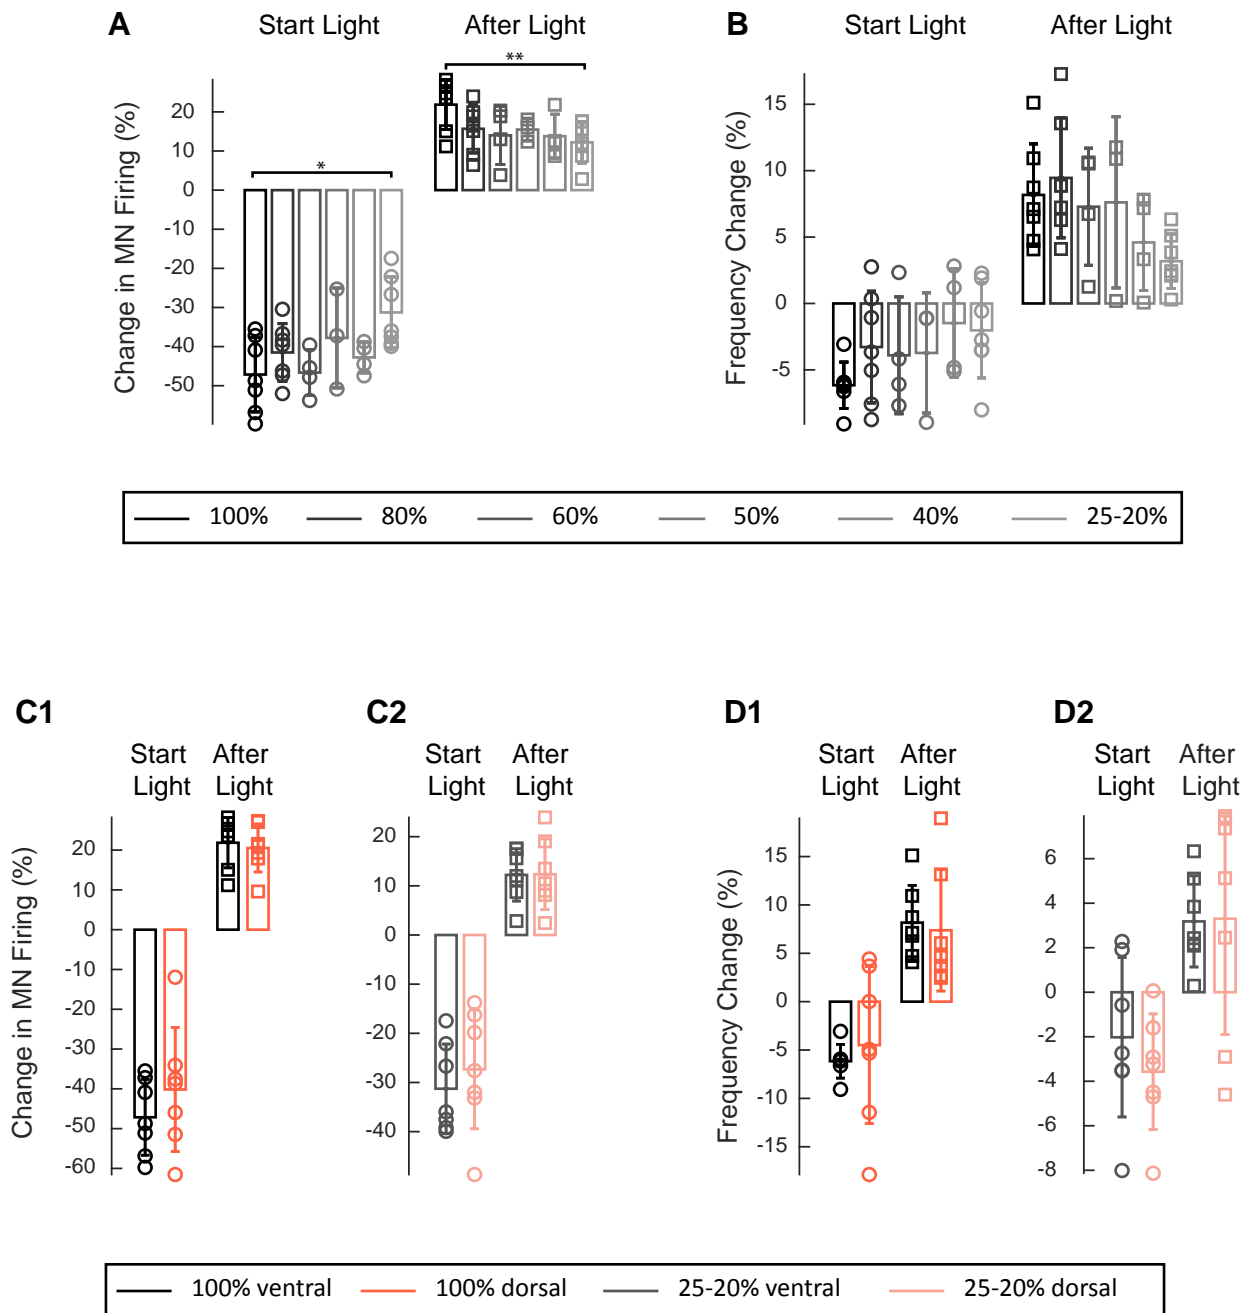

Supplement: supp [file elife_poa_e26622_Figure_2_figure_Supplement_2.pdf › elife_poa_e26622_Figure_2_figure_Supplement_2.pdf]

Figure 2—figure supplement 1

**A** Wild type

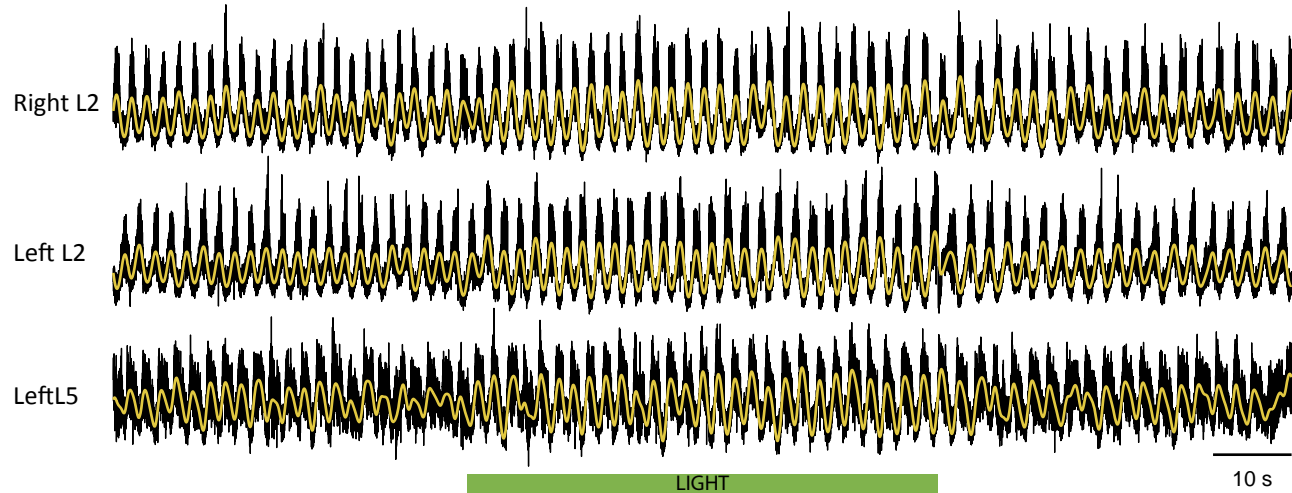

**B1** Abs.  $\Phi$  (degrees)

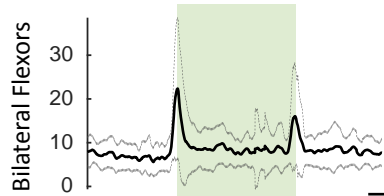

**C1** Freq. Change (%)

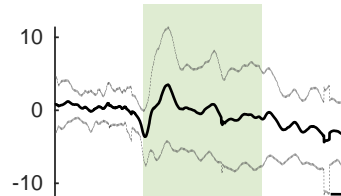

**D1** Change in MN Firing (%)

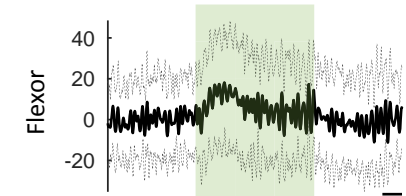

**B2**

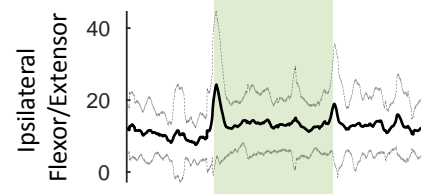

**C2**

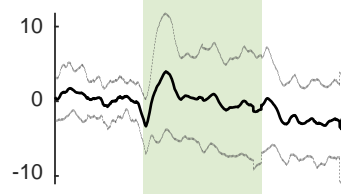

**D2**

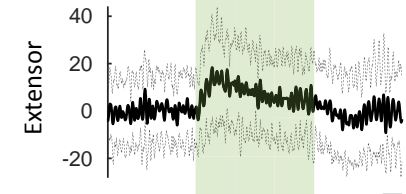

10 s

Supplement: supp [file elife_poa_e26622_Figure_2_figure_supplement_1.pdf › elife_poa_e26622_Figure_2_figure_supplement_1.pdf]

Figure 4—figure supplement 1

**A1**

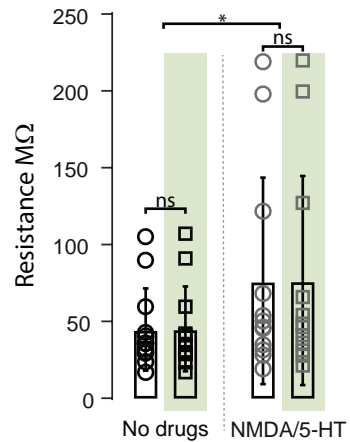

**A2**

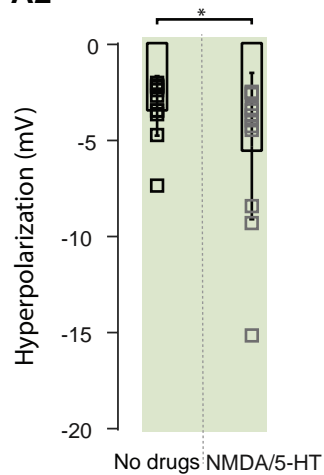

Supplement: supp [file elife_poa_e26622_Figure_4_figure_supplement_1.pdf › elife_poa_e26622_Figure_4_figure_supplement_1.pdf]

Figure 4—figure supplement 3

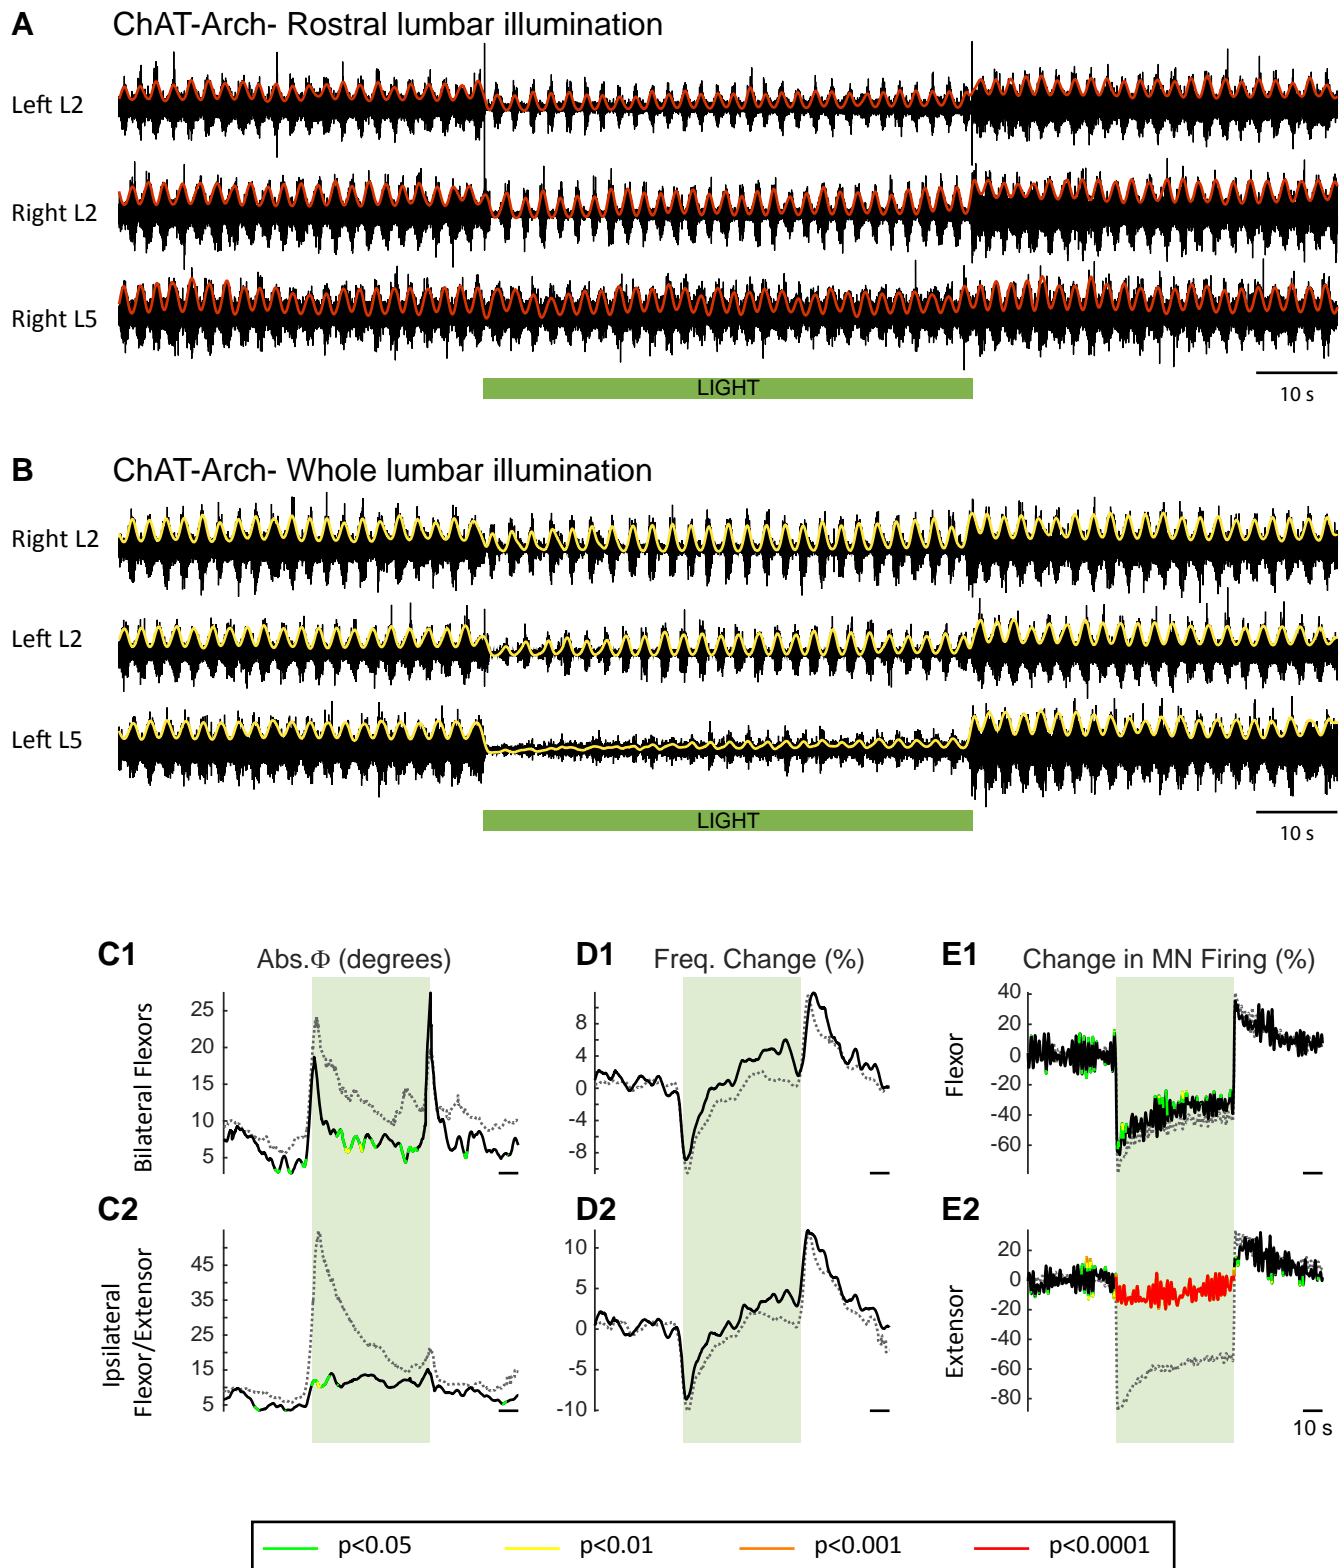

Supplement: supp [file elife_poa_e26622_Figure_4_figure_supplement_3.pdf › elife_poa_e26622_Figure_4_figure_supplement_3.pdf]

Figure 5—figure supplement 1

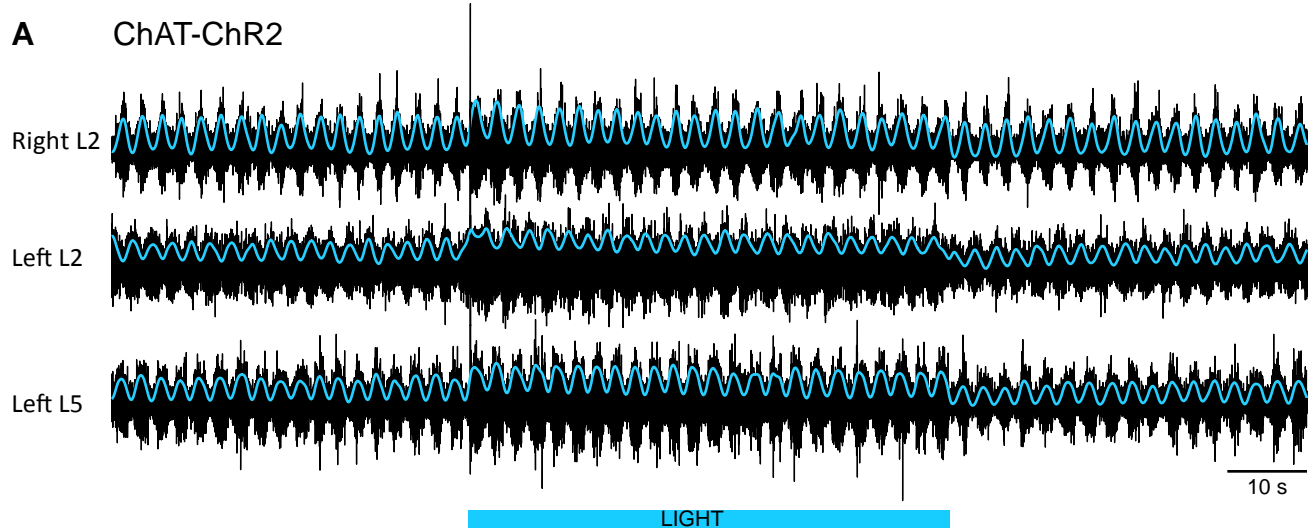

Supplement: supp [file elife_poa_e26622_Figure_5_figure_supplement_1.pdf › elife_poa_e26622_Figure_5_figure_supplement_1.pdf]

Figure 6—figure supplement 1

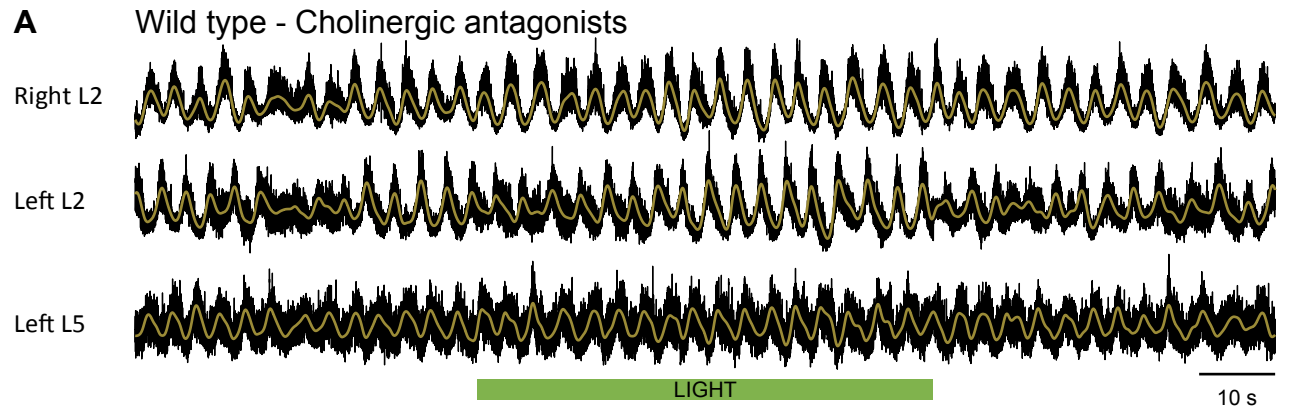

**B1** Abs.  $\Phi$  (degrees)

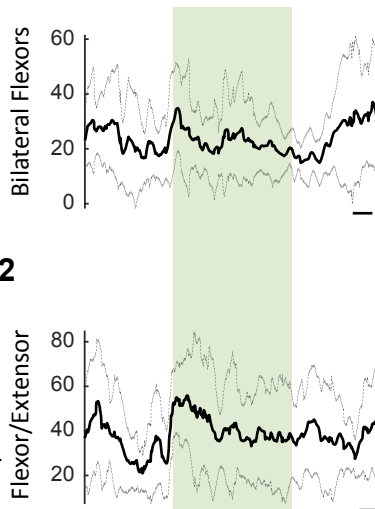

**C1** Freq. Change (%)

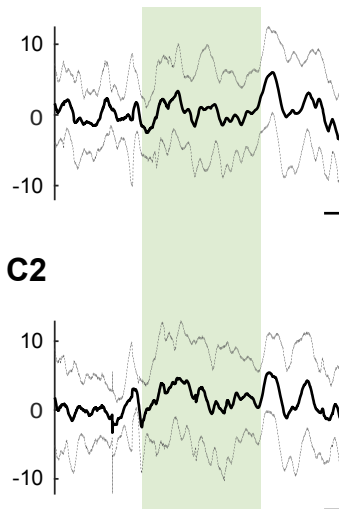

**D1** Change in MN Firing (%)

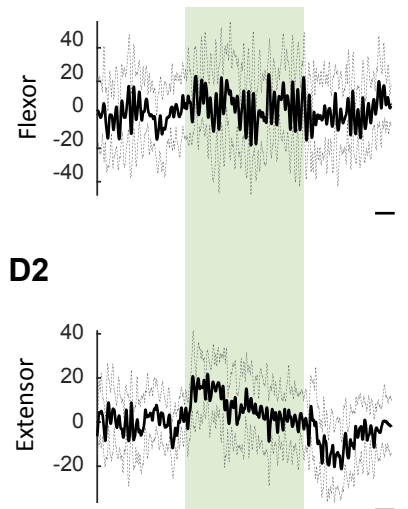

**B2**

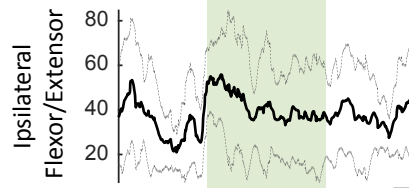

**C2**

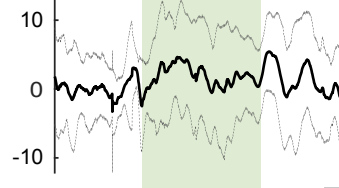

**D2**

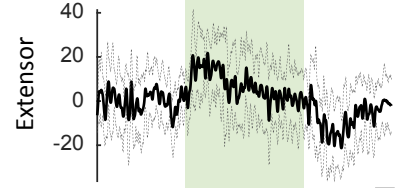

Supplement: supp [file elife_poa_e26622_Figure_6_figure_supplement_1.pdf › elife_poa_e26622_Figure_6_figure_supplement_1.pdf]

Figure 7—figure supplement 1

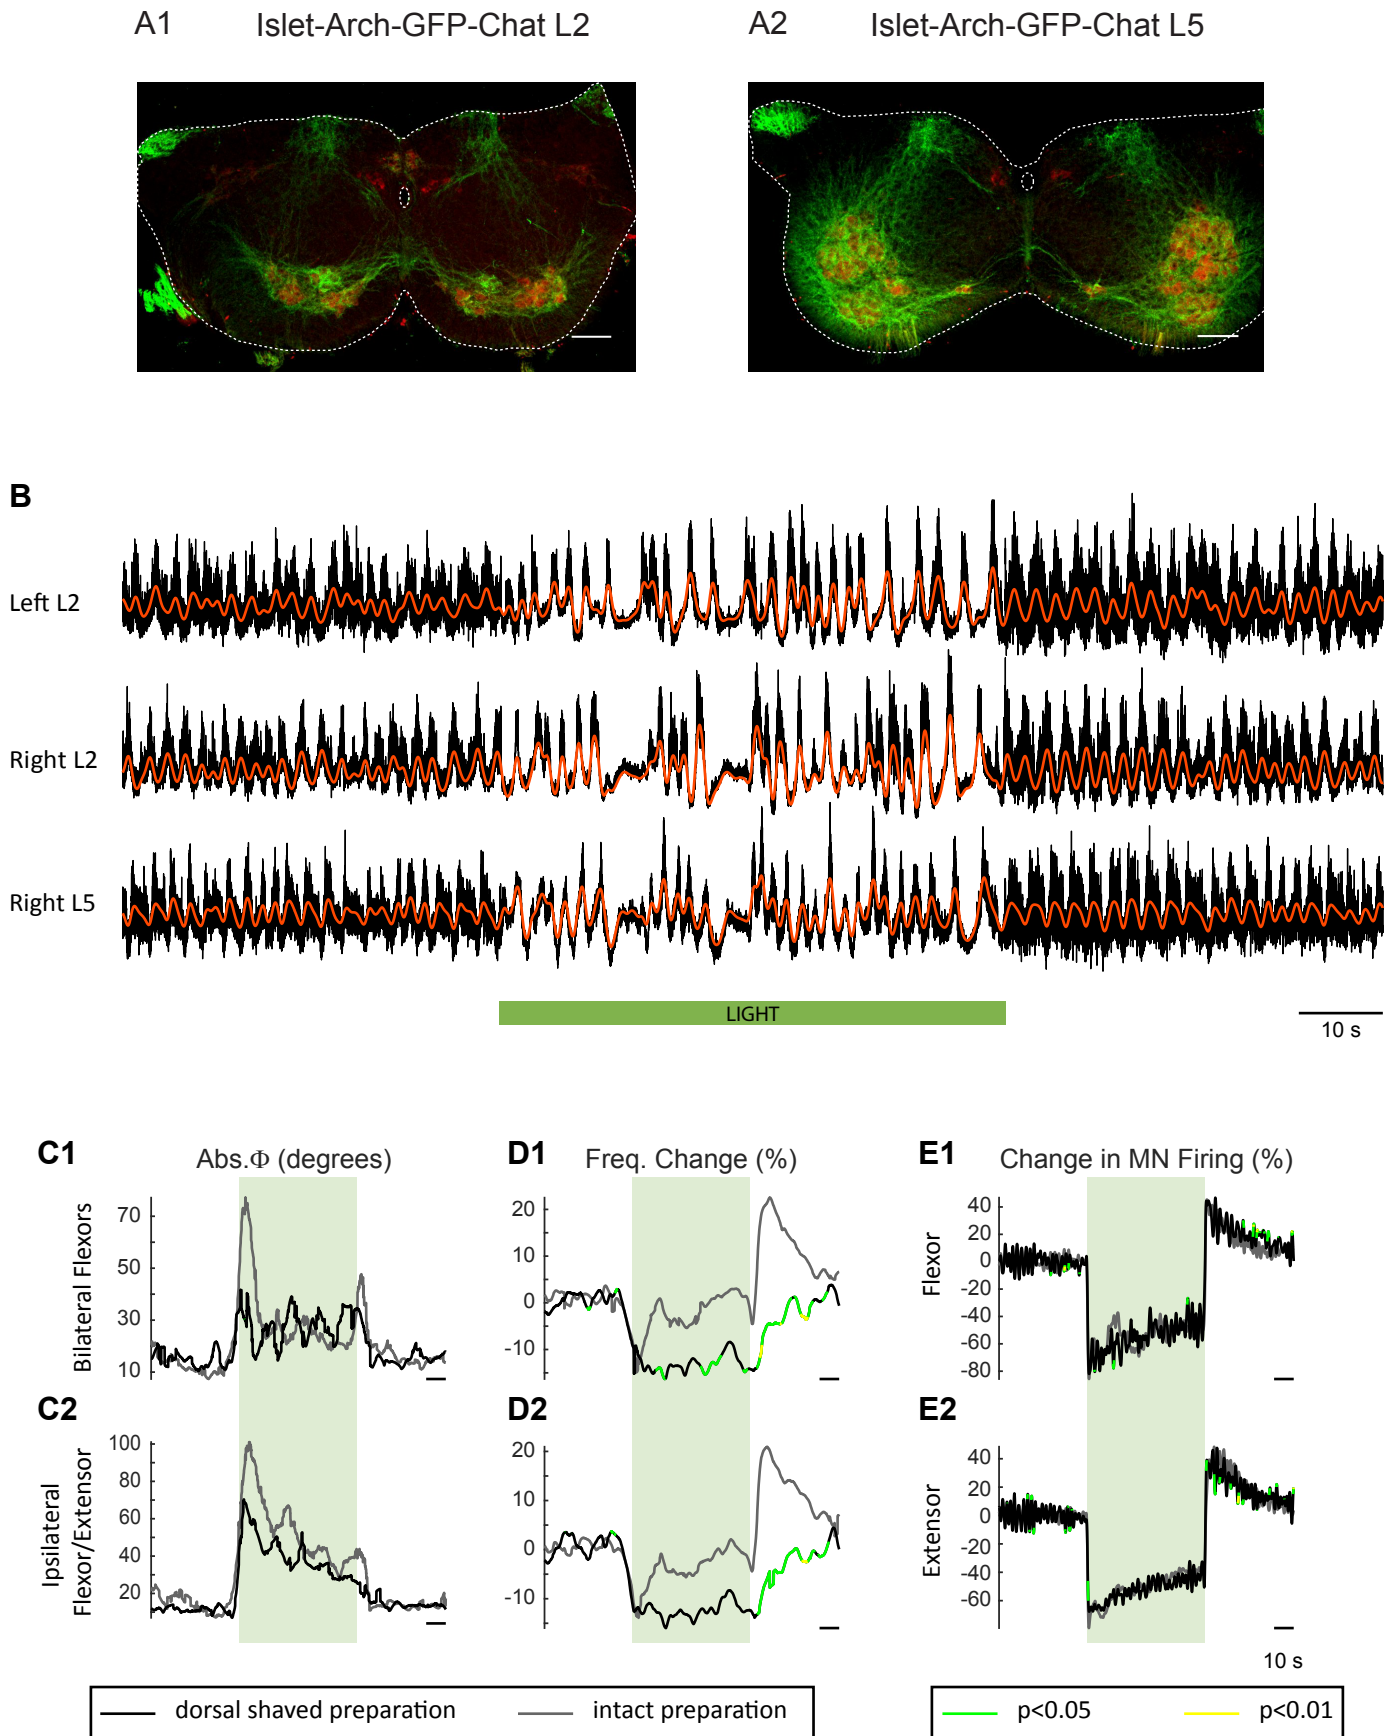

Supplement: supp [file elife_poa_e26622_Figure_7_figure_Supplement_1.pdf › elife_poa_e26622_Figure_7_figure_Supplement_1.pdf]

Figure 9—figure supplement 1

**A** Wild type - NBQX

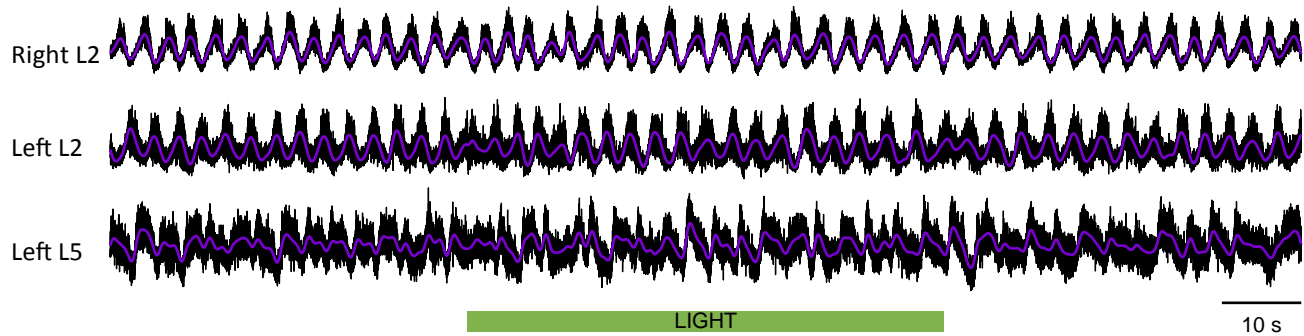

**B1**

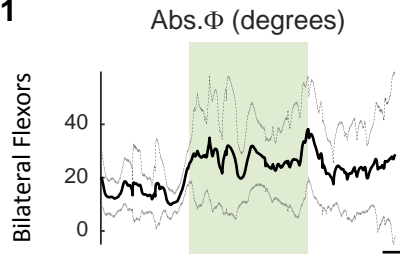

**B2**

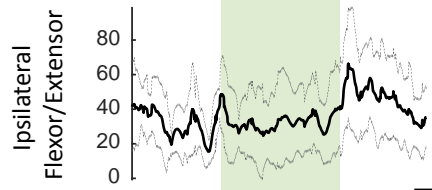

**C1**

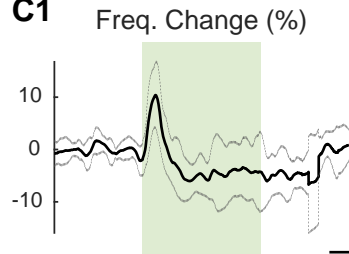

**C2**

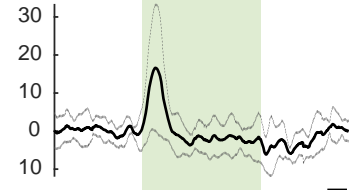

**D1**

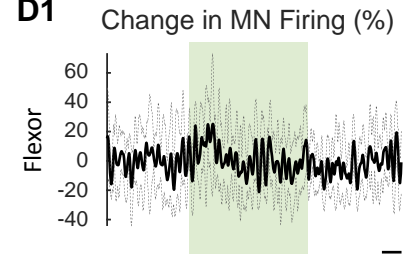

**D2**

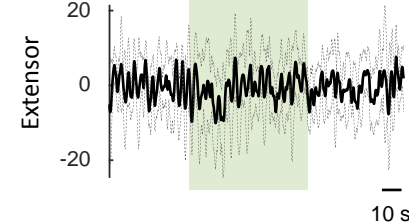

Supplement: supp [file elife_poa_e26622_Figure_9_figure_supplement_1.pdf › elife_poa_e26622_Figure_9_figure_supplement_1.pdf]
